# Supplementary material
Source: publisher figshare collection journal article supplement (https://acs.figshare.com/ndownloader/files/4677550)

## COVER PAGE OF SUPPORTING INFORMATION

### LIST OF AUTHORS AND AFFILIATIONS:

Ana M. Gil<sup>1,\*</sup>, Gonalo Graa<sup>1</sup>, Iola F. Duarte<sup>1</sup>, Brian J. Goodfellow<sup>1</sup>, Ant3nio S. Barros<sup>2</sup>, Isabel M. Carreira<sup>3</sup>, Ana Bela Couceiro<sup>4</sup>, Manfred Spraul<sup>5</sup>

<sup>1</sup>CICECO, Department of Chemistry, Campus Universit3rio de Santiago, University of Aveiro, 3810-193 Aveiro, Portugal

<sup>2</sup>QOPNAA, Department of Chemistry, Campus Universit3rio de Santiago, University of Aveiro, 3810-193 Aveiro, Portugal

<sup>3</sup>Center for Neuroscience and Cell Biology, Faculty of Science and Technology, University of Coimbra, 3001-401 Coimbra, Portugal

<sup>4</sup>Maternidade Bissaya Barreto, Centro Hospitalar de Coimbra, Coimbra

<sup>5</sup>Bruker Biospin GmbH, Silberstreifen, D76287 Rheinstetten, Germany

\*Corresponding author: tel +351 234 370707, fax +351 234 370084, e-mail:

**TITLE OF PRIMARY PAPER:** The potential of NMR spectroscopy for the study of human amniotic fluid

**ABSTRACT OF SI:**

This SI section includes two figures showing 1D and 2D NMR spectra of human amniotic fluid (HAF) containing additional information on specific compound assignments. Figure S-1 shows three expansions of a 1D  $^1\text{H}$  NMR spectrum of human amniotic fluid (HAF) where the major assignments are specified. Figure S-2 shows expansions of a TOCSY spectrum (top) and a  $^1\text{H}/^{13}\text{C}$  correlation spectrum (bottom) of HAF, again showing the assignments of the major peaks. This information should be useful for the reader to interpret more fully the NMR spectra of HAF shown in the main paper.

**Figure S-1.** Expansions of a) high-, b) medium- and c) low-field regions of the 800MHz 1D  $^1\text{H}$  NMR spectrum of HAF reconstituted from a freeze-dried sample, pH 9. Assignments: 1,  $\alpha$ -hydroxybutyrate; 2, leucine; 3, isoleucine; 4, valine; 5, U8; 6,  $\alpha$ -oxoisovalerate; 7,  $\beta$ -hydroxybutyrate; 8,  $\alpha$ -hydroxyisobutyrate; 9, threonine; 10, lactate; 11, alanine; 12, lysine; 13, acetate; 14, N-acetyl groups (glycoproteins); 15, proline; 16, methionine; 17, glutamate; 18, pyruvate; 19, succinate; 20, citrate; 21, U22; 22, creatine; 23, creatinine; 24, choline; 25, carnitine; 26,  $\beta$ -glucose; 27, U27; 28, glycine; 29,  $\alpha$ -glucose; 30, betaine; 31, myo-inositol; 32, U39; 33, fumarate; 34, tyrosine; 35, histidine; 36, phenylalanine; 37, formate.

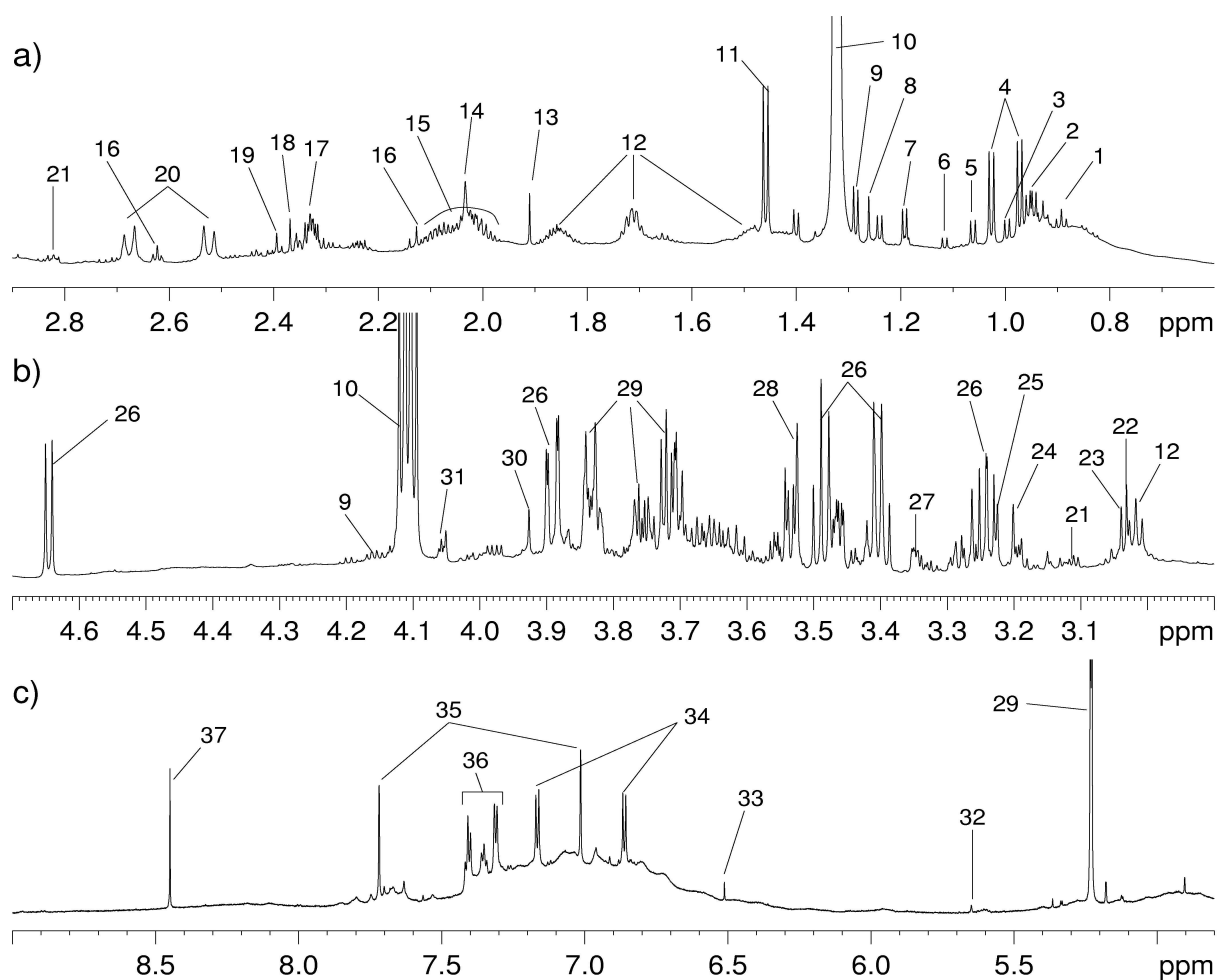

**Figure S-2.** Expansions of a a) TOCSY spectrum and a b)  $^1\text{H}/^{13}\text{C}$  heteronuclear single quantum coherence (HSQC) correlation spectrum of HAF, at 800MHz. Assignments: 1, isoleucine; 2,  $\alpha$ -hydroxybutyrate leucine; 3, valine; 4,  $\alpha$ -aminobutyrate; 5, U6; 6, valine; 7, U8; 8, U9; 9,  $\beta$ -hydroxybutyrate; 10, lactate; 11, threonine; 12, U12; 13, alanine; 14, lysine; 15, arginine; 16, proline; 17, glutamate + glutamine; 18, hydroxyproline; 19, carnitine; 20, citrate; 21, methionine; 22, U13; 23, U22; 24, tyrosine; 25, histidine; 26, ethanolamine; 27, U27; 28,  $\beta$ -glucose; 29,  $\alpha$ -glucose; 30, myoinositol; 31, taurine; 32, U24; 33, U4; 34,  $\alpha$ -oxoisovalerate; 35,  $\alpha$ -hydroxyisobutyrate; 36, U17; 37, U16; 38, N-acetyl groups (glycoproteins); 39, pyruvate; 40,  $\alpha$ -ketoglutarate; 41, succinate; 42, oxaloacetate; 43, U19; 44, creatinine; 45, creatine; 46, choline; 47, betaine; 48, glycine; 49, U28; 50, U15.

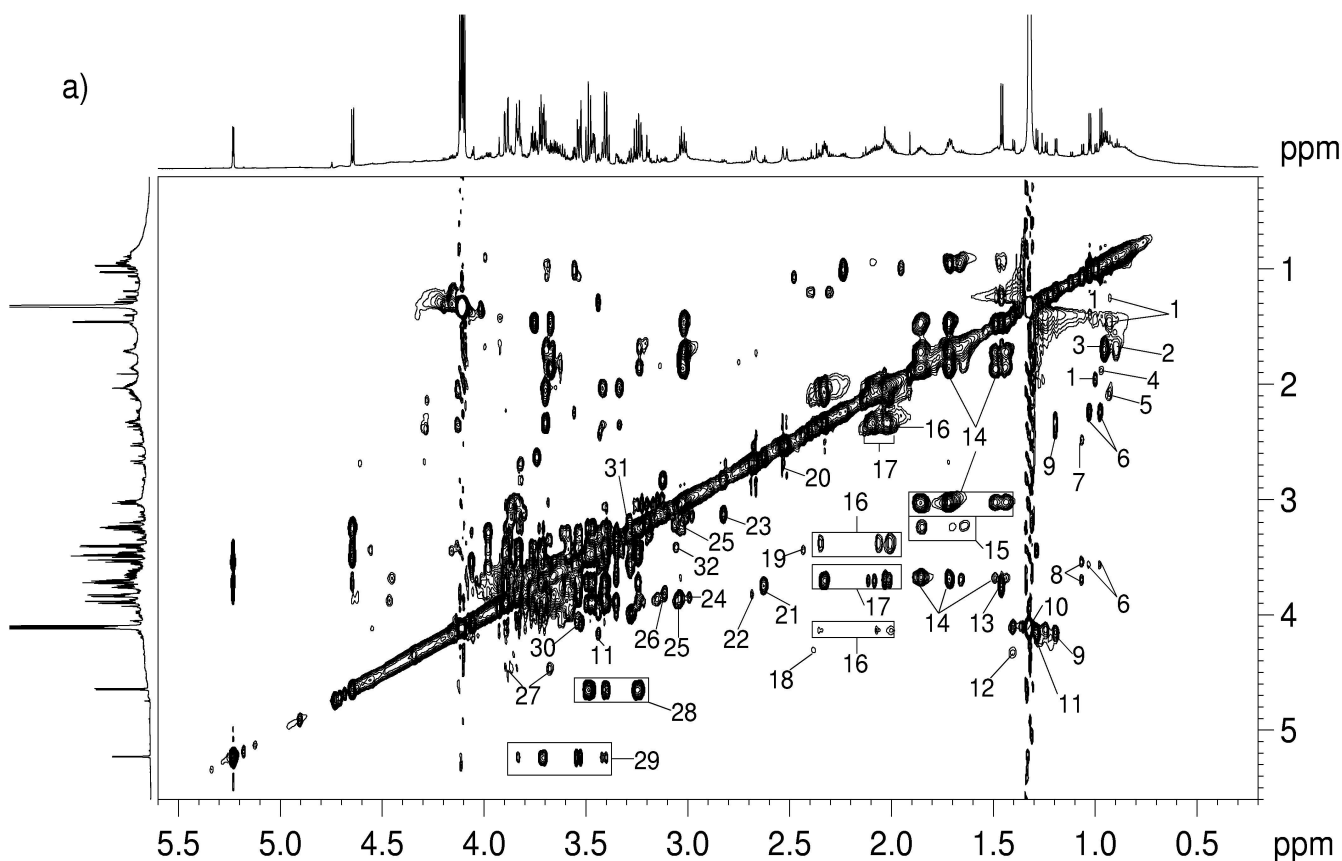

b)

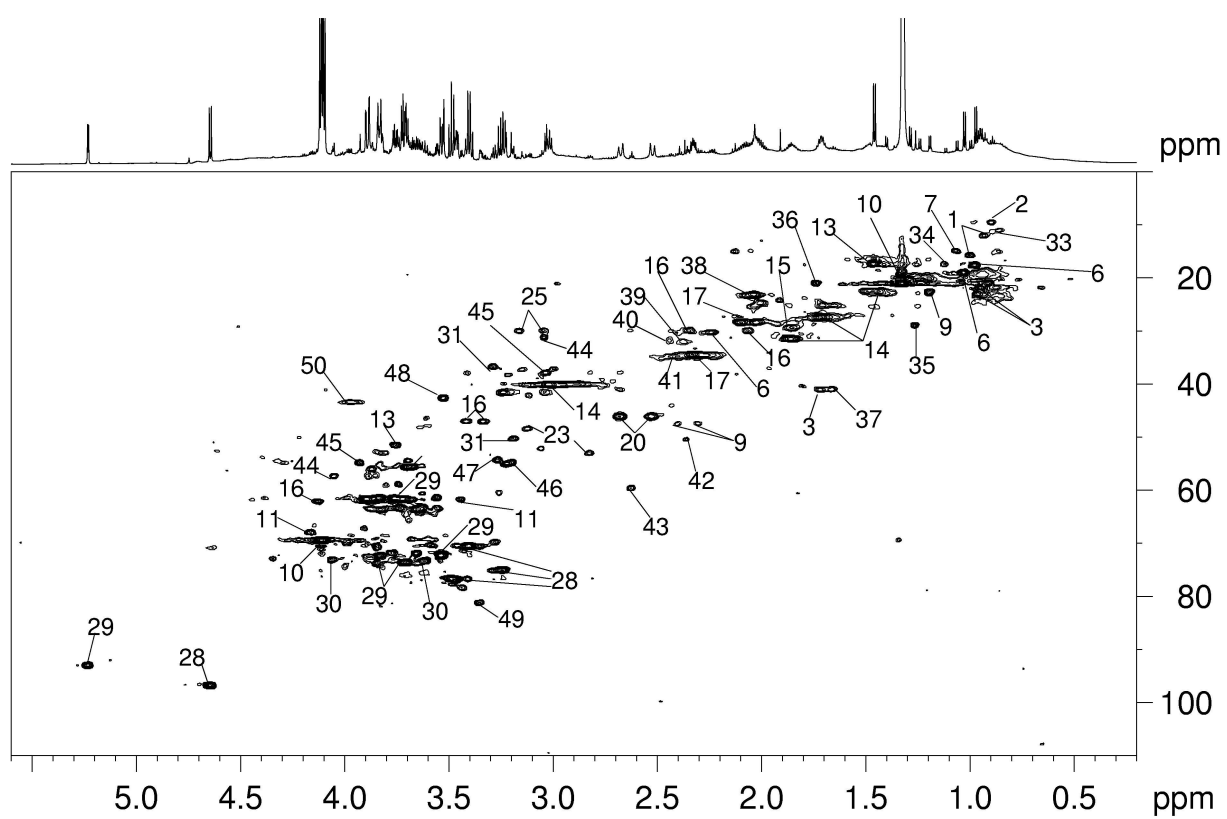

Supplement: Supplementary file 1 [file 4677550]
